# Supplementary material for: Gut Microbiota Ecological and Functional Modulation in Post-Stroke Recovery Patients: An Italian Study
Source: MDPI journal article supplement (doi:10.3390/microorganisms12010037), 2023-12-25
Supplement: s1 [file s1]

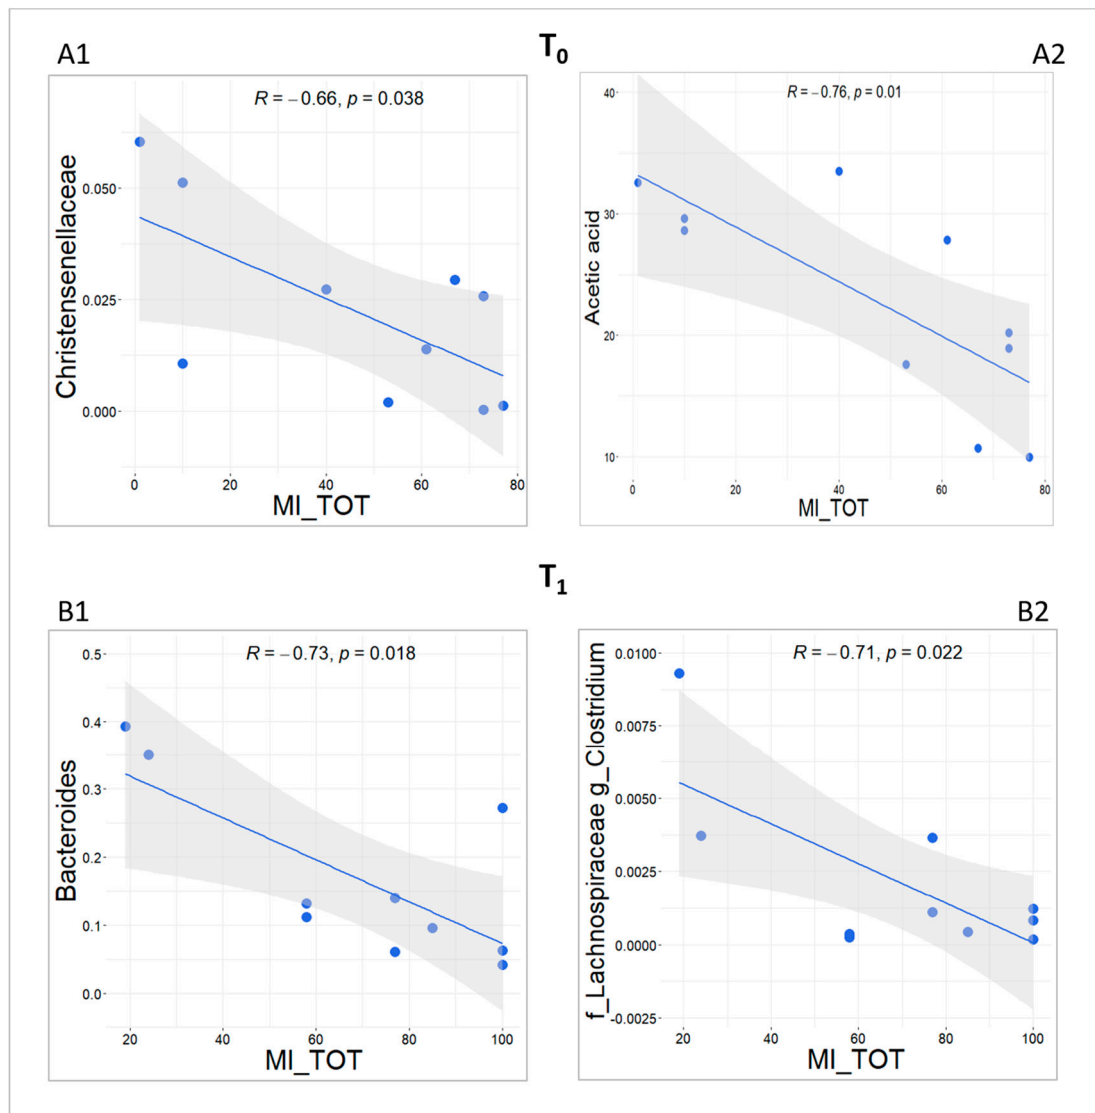

**Figure S3:** Significant Pearson correlations between ASVs and SCFAs at T<sub>0</sub> (A) and T<sub>1</sub> (B) with motricity index (MI\_TOT). (A1) Christensenellaceae; (A2) Acetic acid; (B1) *Bacteroides*; (B2) *Clostridium* (Lachnospiraceae). Only statistically significant ( $p$ -value  $\leq 0.05$ ) correlations between ASVs, SCFAs and MI\_TOT were showed.
