# Supplementary material for: Gut Microbiota Ecological and Functional Modulation in Post-Stroke Recovery Patients: An Italian Study
Source: MDPI journal article supplement (doi:10.3390/microorganisms12010037), 2023-12-25
Supplement: s1 [file s1]

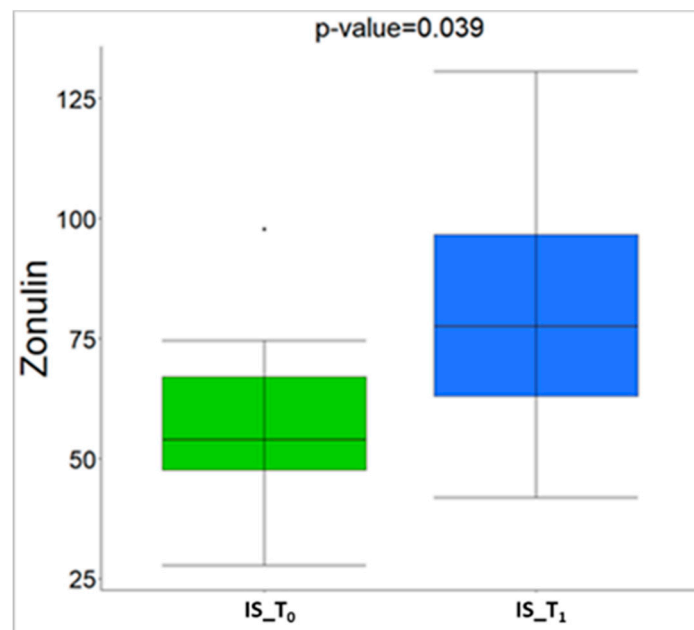

**Figure S2:** Distribution of Zonulin in IS patients T<sub>0</sub> and IS patients T<sub>1</sub>.  
T-test  $p$ -value  $\leq 0.05$ .  
IS\_T<sub>0</sub>: IS patients at T<sub>0</sub>; IS\_T<sub>1</sub>: IS patients at T<sub>1</sub>; CTRL: controls subjects.
